# Supplementary material for: Characterization of Collapsin Response Mediator Protein 2 in Colorectal Cancer Progression in Subjects with Diabetic Comorbidity
Source: MDPI journal article supplement (doi:10.3390/cells11040727), 2022-02-18
Supplement: s1 [file s1]

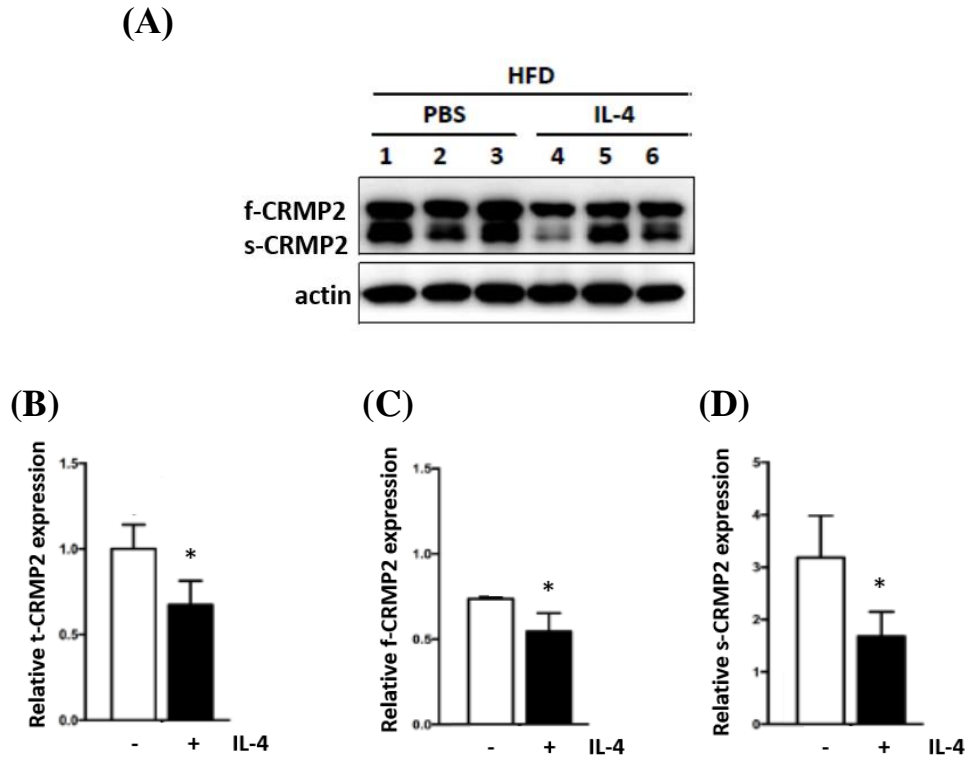

**Figure S1. Regulation of CRMP2 in adipose tissue under diabetic and insulin resistance status.**

(A) Epididymal adipose tissues were obtained from mice fed with chow diet or high fat diet (HFD)-induced insulin resistance with IL-4 administration. Alternations of CRMP2 were analyzed by Western blots. (B-D) The quantitative results from (A) were presented as the mean  $\pm$  SEM (n=3), \*  $p < 0.05$ , \*\*\*  $p < 0.005$ . (#The HFD mice with PBS treatment were the same mice group published in ref. 18.)
